# Supplementary material
Source: PubMed Central journal article supplement (PMC3591665)

## **SUPPLEMENTAL EXPERIMENTAL PROCEDURES**

### *Plasmid constructions*

The full-length coding region of human HIF2 $\alpha$  or HIF1 $\alpha$  genes (gifts from Dr. Richard Bruick and Dr. Amato Giaccia, respectively) was PCR amplified in frame with a forward linker encoding HA tag downstream a NheI restriction site and a reverse linker with a NotI site downstream cDNA sequence (see supplemental table 3 for oligonucleotide sequences). The amplified PCR fragments and pCMV hygro 2xFLAG expression vector (gift from Dr. Pierre Lutz, IPBS, Toulouse) were digested by NheI and NotI restriction enzymes, purified and sub-cloned. Fidelity of PCR and identity of the constructs were confirmed by sequencing the inserts.

### *Reporter Gene Assays*

501mel cells were co-transfected with 100 ng of pHRE-luc, a firefly luciferase reporter gene under control of three HRE binding sites (gift from Dr. Jacques Pouyssegur), 50 ng of a renilla luciferase construct (pCMV-RL, Promega France) and 100 ng of pCMV-FLAG/HA HIF $\alpha$  or 100 ng of pCMV-hygro 2xFLAG (pCMV-Flag) empty vector. After 48h of culture, firefly and renilla luciferase activities were assayed with the dual luciferase assay system (Promega France). Firefly luciferase activity was normalized to renilla luciferase activity to take into account transfection efficiency. Each assay was performed in duplicate in three independent experiments.

### *Immunofluorescence*

Cells were grown on coverslips at 37°C for at least 16h and subsequently washed, fixed for 15 min in 3.7% paraformaldehyde, permeabilized (0.1% triton X100, 5 min), blocked and incubated for 2h with an HA antibody (supplemental Table 3) in PBS containing 1% BSA (PBS-BSA). Subsequently, coverslips were washed with PBS-BSA, incubated with FITC-conjugated secondary antibody in PBS-BSA for 1h at room temperature, washed again with PBS, incubated for 5 min with DAPI, air-dried

and embedded in Dako Cytomation Fluorescent Mounting Medium. Fluorescence was detected using a Leica microscope (Leitz DMRB; 100x objective). Images were acquired as sets of color-images and prepared using Photoshop software.

#### *RNA extraction and RT-PCR*

Total RNA was extracted using the RNeasy Extraction Kit (Qiagen). Each RNA sample was reverse transcribed with the Superscript III First Strand Synthesis Kit (Invitrogen) starting from 1 µg of total RNA. Quantitative real-time PCR was performed on an ABIPrism 7000 (Applied Biosystems) using  $\beta$ -actin, HPRT and YWHAZ as internal standards to control variability in cDNA quantity. Primer sequences are available on request. Each 20 µl reaction consisted of 2 µl of cDNA, 1x iQ SYBR Green Supermix (Bio-Rad) and 500 nM of primers. The amount of the target transcript was related to that of the reference genes by the  $\Delta\Delta C_t$  method. All cDNA samples were assayed in triplicate and at least three independent experiments were carried out.

**Supplemental table 1: Lists of the already identified partners of HIF subunits 1 $\alpha$ , 2 $\alpha$  and 1 $\beta$ .**

Protein lists have been obtained from two different internet facilities: biogrid (<http://thebiogrid.org/>) and Human Protein Reference Database (<http://www.hprd.org/>). Proteins validated in the current study according to our screening criteria are in bold in the last two columns of the table. HIF1 $\alpha$ , HIF2 $\alpha$  and HIF1 $\beta$ : respectively first, second and third worksheet.

**Supplemental table 2: Lists of peptide sequences identified and quantified in all gel bands analyzed.** Worksheets A1 to A11 correspond to peptide data identification in the eleven fractions cut along the migration lines for experiment 1. For each fraction level, identification and quantification data (peptide sequence, theoretical mass, charge, measured m/z, retention time, Mascot score and measured XIC area) are given. Identical data are provided for the other analyses (worksheets B1 to B11 for experiment 2, C1 to C11 for experiment 3 and D1 to D11 for experiment 4).

**Supplemental table 3: List of antibodies and oligonucleotides used in this study.**

**Supplemental Fig. 1: Flag/HA tagged HIF2 $\alpha$  exhibits normal sub-cellular localization and transactivation properties.**

Full-length HIF2 $\alpha$  cDNA was cloned downstream to Flag and HA tags in a pCMV vector.

A- Plasmid map of pCMV-Flag/HA HIF2 $\alpha$  vector.

B- Transactivation of HRE-luciferase reporter gene by Flag/HA-HIF2 $\alpha$ . Correct functionality of the fusion protein was tested by transient co-transfection of 501mel cells with pCMV Flag/HA HIF2 $\alpha$  and a luciferase reporter gene under the control of HRE (Hypoxia Responsive Element). 501mel cells were transiently co-transfected with both pHRE-luc (firefly luciferase gene under control of 3 HRE) and pCMV-RL (renilla luciferase gene) vectors and with the pCMV-Flag/HA-HIF2 $\alpha$  vector or with the

empty plasmid (Mock). Cells were cultured for 48h under normoxia before luciferase assay. Firefly luciferase activities were normalized to renilla luciferase activities. Data are representative of three independent experiments undertaken in duplicate (means  $\pm$  SEM). Transient Flag/HA HIF2 $\alpha$  expression in 501mel cells strongly increased luciferase activity in comparison to empty vector-transfected cells.

C- Immunofluorescence analysis of HIF2 $\alpha$  localization. Nuclear localization of exogenous HIF2 $\alpha$  was checked by immunofluorescence using an anti-HA antibody. Cells were seeded on glass coverslips and transfected with pCMV-Flag/HA-HIF2 $\alpha$  vector (HIF2 $\alpha$ ) or with the empty plasmid (Mock). Immunofluorescence experiments were performed 24h after transfection. Exogenous HIF2 $\alpha$  was labeled using an anti-HA antibody and a FITC-conjugated secondary antibody. Flag/HA HIF2 $\alpha$  was predominantly located in the cell nucleus as confirmed by DAPI staining.

D- Western-blot analysis of HIF proteins expression. Protein extracts prepared from untransfected 501mel or from 501mel cells stably transfected with pCMV-Flag/HA HIF2 $\alpha$  (H2) or with the empty vector (Mock) were probed by western blotting with the indicated antibodies. Actin was used as a loading control. Hypoxic conditions (H) were obtained by incubating cells with the hypoxia-mimetic CoCl<sub>2</sub>. N: normoxic conditions. As expected, HIF2 $\alpha$  expression was enhanced in the presence of CoCl<sub>2</sub> but could also be observed in normoxia for clone H2.

**Supplemental Fig. 2: Four way Venn diagrams comparing number of protein identified in each biological replicate.**

A- Venn diagram showing the number of proteins identified in the four experiments.

B- Venn diagram showing the number of validated proteins in the four experiments according to screening criteria used in the current study.

**Supplemental Fig. 3: Scatter plots comparing protein abundance in Mock and H2 assays.**

Protein abundance index (PAI) was determined from label free quantification of anti-Flag immunoprecipitated proteins from Mock compared to H2 nuclear extracts. Four independent experiments were performed. Data from the log(protein amount in H2 sample) (y axis) are plotted *versus* log(protein amount in Mock sample) (x axis). Each diamond represents single protein identification. The red line defines a ratio of 1 (unchanged protein abundance in the two assays, H2 vs Mock). The green line, included in the insert of each experiment, indicates the applied threshold value *i.e.* a fold change of 4. Proteins located above the green line are considered to be HIF2 $\alpha$  specific partners. Green diamonds point out proteins only present in H2 assays. HIF2 $\alpha$  (EPAS1), MITF, SOX10 and AP2 $\alpha$  (TFAP2A) are indicated in red.

**Supplemental Fig. 4: Schematic representation of two transcriptional complexes found as HIF2 $\alpha$  interactors.**

A- The Mediator complex. Three modules can be defined in the structure of Mediator: head, middle and tail. The head presents variability (for MED27, MED28 and MED29). MED21, which is indicated by a red arrow, is the only subunit not identified in HIF2 $\alpha$  interactome. MED18 and MED20 (indicated by blue arrows) are labile subunits.

B- BRM/BRG1 complex. These two complexes are members of the SWI/SNF family. SMARCA2 (BRM) is encountered in the BRM complex whereas SMARCA4 (BRG1) is found in the BRG1 complex. SMARCD1 or SMARCD2 are present indifferently in the two complexes. All the proteins of these two complexes have been identified as HIF2 partners. SMARCA2: BRM; SMARCA4: BRG1.

**Supplemental Fig. 5: Alignment of CBP and P300 protein sequences.**

CBP (CREBBP) and P300 (EP300) protein sequences have been aligned. Stars indicate sequence identities. Bold blue sequences are MS/MS identified peptides exclusively found in CBP or P300

amino acid sequence. Bold red sequences are MS/MS identified peptides common to both CBP and P300.

**Supplemental Fig. 6: Flag/HA tagged HIF1 $\alpha$  exhibits normal subcellular localization and transactivation properties.**

The strategy to assess the presence of proteins in HIF1 $\alpha$ -containing protein complexes was similar to that used for HIF2 $\alpha$ .

A- Transactivation of HRE-luciferase reporter gene by the pCMV-Flag/HA-HIF1 $\alpha$ . 501mel cells were transiently co-transfected with both pHRE-luc (firefly luciferase) and pCMV-RL vectors with the pCMV Flag/HA HIF1 $\alpha$  vector or with the empty pCMV plasmid (Mock). Firefly luciferase activities were measured in normoxia conditions and normalized to renilla luciferase activities. Data are representative of three independent experiments undertaken in duplicate (means  $\pm$  SEM).

B- Immunofluorescence analysis of HIF1 $\alpha$  localization. Cells were seeded on glass coverslips and transfected with pCMV-Flag/HA-HIF1 $\alpha$  vector (HIF1 $\alpha$ ) or with the empty plasmid (Mock). Immunofluorescence experiment was performed, 24h after transfection, using an anti-HA antibody.

C- Western blot analysis of HIF1 $\alpha$  protein expression. Protein extracts, prepared from untransfected 501mel or from 501mel cells stably transfected with pCMV Flag/HA HIF1 $\alpha$  (H1) or with the empty pCMV vector (Mock), were probed by western blotting with the indicated antibodies. Actin was used as a loading control. Hypoxic conditions (H) were obtained by incubating cells with the hypoxia mimetic CoCl<sub>2</sub>. N: normoxic conditions.

**Supplemental Fig. 7: HIF $\alpha$  and MITF gene expression following up or down regulation of HIF $\alpha$  subunits.**

A- Reverse transcriptase (RT)-qPCR analysis of HIF1 $\alpha$ , HIF2 $\alpha$  and MITF expression following the indicated overexpressions or siRNA-mediated knockdowns. Mock is for the 501mel cell line stably

transfected with an empty vector, H1 and H2 are for cell lines overexpressing respectively HIF1 $\alpha$  and HIF2 $\alpha$ . Cells were treated (H) or not (N) with CoCl<sub>2</sub> 36h after siRNA transfection and cultured for 12 additional hours. siC, siH1, siH2 are for cell lines transiently transfected by respectively a non-targeting siRNA, siRNA targeting HIF1 $\alpha$  and HIF2 $\alpha$  mRNA. Results from cells cultured in normoxia or under hypoxia-mimicking conditions are respectively in dark grey or in light grey. The changes in expression of the indicated genes were expressed relatively to the control (Mock for overexpression and siC for knock-down).

B- Immunoblot of total extracts from cells following transfection of siRNAs against HIF $\alpha$  subunits or non-targeting siRNA as control,  $\beta$ -actin is used as loading control. Whatever the expression level of HIF $\alpha$  genes was (augmented in H1 and H2 clones and almost extinct in 501mel cells treated with siH1 or siH2), MITF expression was not affected, neither at mRNA (A) nor protein (B) level.

\*:  $p$  value < 0.01; \*\*:  $p$  value < 0.001.

**Supplemental Fig. 8: Migration and invasion capacities of six human melanoma cell lines measured under normoxia.**

A- Equal number of melanoma cells was subjected to migration assays. Total and migratory cell numbers were evaluated. The results were expressed as percentage of migrating cells.

B- Invasion assays were performed using Matrigel invasion chambers. Three sets of independent experiments were carried out, each in duplicate. Data are presented as mean  $\pm$  SEM (n = 3). SK28 is for SK-MEL-28 and Lu for Lu1205.

**Supplemental Fig. 9: Annotated MS/MS spectra of single peptide-based protein identifications.**

Supplemental table 3

| <b>Antibodies</b>                 |                          |                                                                   |                         |                          |
|-----------------------------------|--------------------------|-------------------------------------------------------------------|-------------------------|--------------------------|
| <b>Protein target</b>             | <b>Furnishers</b>        | <b>Product reference</b>                                          | <b>IP concentration</b> | <b>WB or IP dilution</b> |
| HIF1 $\alpha$                     | Novus                    | NB100-134                                                         | 2 $\mu$ g/ml            | 1/1000                   |
| HIF1 $\beta$                      | Santa Cruz Biotechnology | sc-5580                                                           |                         | 1/200                    |
| HIF2 $\alpha$                     | Santa Cruz Biotechnology | sc-46691                                                          |                         | 1/200                    |
| HIF2 $\alpha$                     | Novus                    | NB100-122                                                         | 2 $\mu$ g/ml            |                          |
| SOX10                             | Santa Cruz Biotechnology | sc-17342                                                          | 2 $\mu$ g/ml            | 1/200                    |
| MITF                              | Santa Cruz Biotechnology | sc-56725                                                          |                         | 1/100                    |
| MITF                              | Santa Cruz Biotechnology | sc-10999X                                                         | 2 $\mu$ g/ml            |                          |
| Actin                             | Santa Cruz Biotechnology | sc-1616                                                           |                         | 1/200                    |
| HA                                | Covance                  | MMS-101P                                                          |                         | 1/1000                   |
| AP2 $\alpha$                      | Santa Cruz Biotechnology | sc-12726X                                                         | 2 $\mu$ g/ml            | 1/1000                   |
| <b>Primers</b>                    |                          |                                                                   |                         |                          |
| <b>qRT-PCR oligonucleotides</b>   |                          |                                                                   |                         |                          |
| HIF2 $\alpha$ – Forward           | 5'                       | TGGCCGCTCAGCCTATGAAT                                              | 3'                      |                          |
| HIF2 $\alpha$ – Reverse           | 5'                       | TGGGTCTCCAGCCACACGTA                                              | 3'                      |                          |
| $\beta$ actin - Forward           | 5'                       | TTCGCAAAGGCTATGCGC                                                | 3'                      |                          |
| $\beta$ actin - Reverse           | 5'                       | GTTACTACCCAGGTCAGGCCAG                                            | 3'                      |                          |
| YWHAZ - Forward                   | 5'                       | ACTTTTGGTACATTGTGGCTTCAA                                          | 3'                      |                          |
| YWHAZ - Reverse                   | 5'                       | CCGCCAGGACAAACCAGTAT                                              | 3'                      |                          |
| <b>Cloning oligonucleotides</b>   |                          |                                                                   |                         |                          |
| HIF2 $\alpha$ – Forward           | 5'                       | GATCGCTAGCT <b>TACCCATACGATGTTCCAGATTACGCTT</b> CTAGAATGACAGCTGAC | 3'                      |                          |
| HIF2 $\alpha$ – Reverse           | 5'                       | CGCGCGGCCGCTCAGGTGGCCTGGTCCAGGGCTCT                               | 3'                      |                          |
| HIF1 $\alpha$ – Forward           | 5'                       | GATCGCTAGCT <b>TACCCATACGATGTTCCAGATTACGCTT</b> CTAGCATGGAGGGCGCC | 3'                      |                          |
| HIF1 $\alpha$ – Reverse           | 5'                       | CGCGCGGCCGCTCAGTTAACTTGATCCAAAGCTCT                               | 3'                      |                          |
| <i>HA tag sequence is in bold</i> |                          |                                                                   |                         |                          |





## Supplemental figure 2

**A**

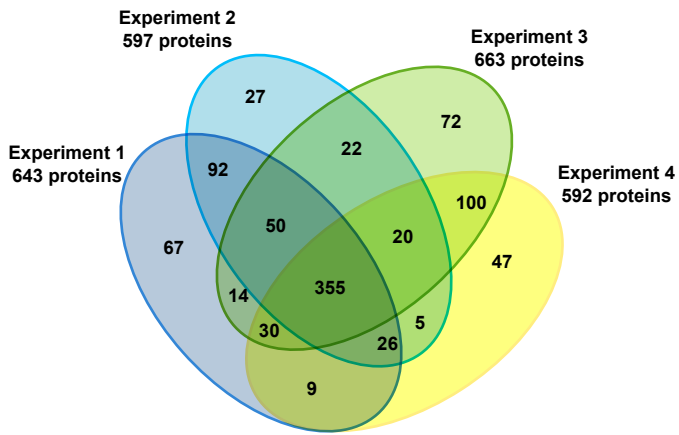

**B**

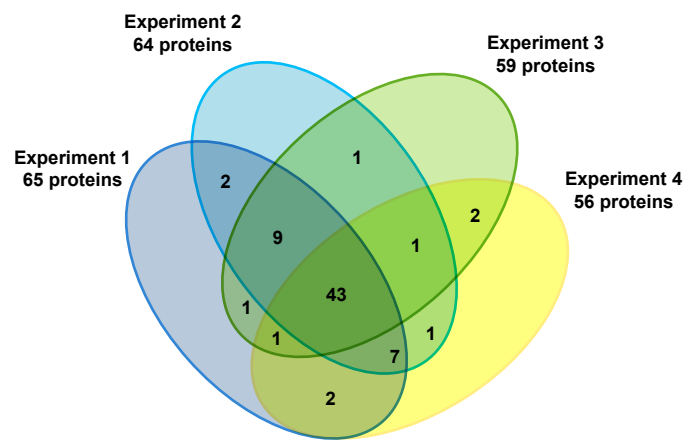

### Supplemental figure 3

Experiment 1

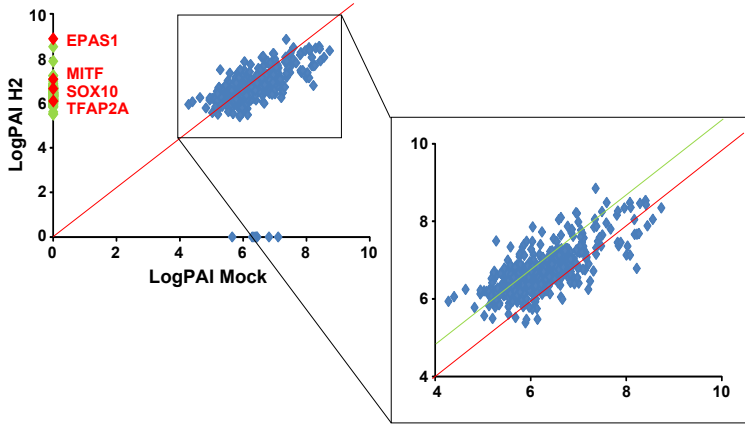

Experiment 2

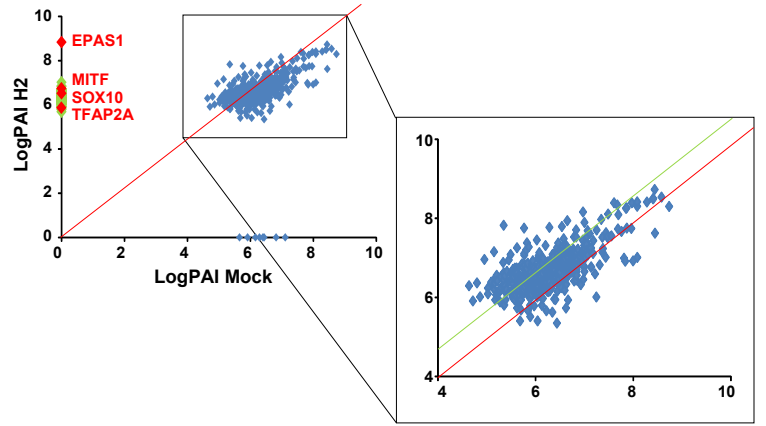

Experiment 3

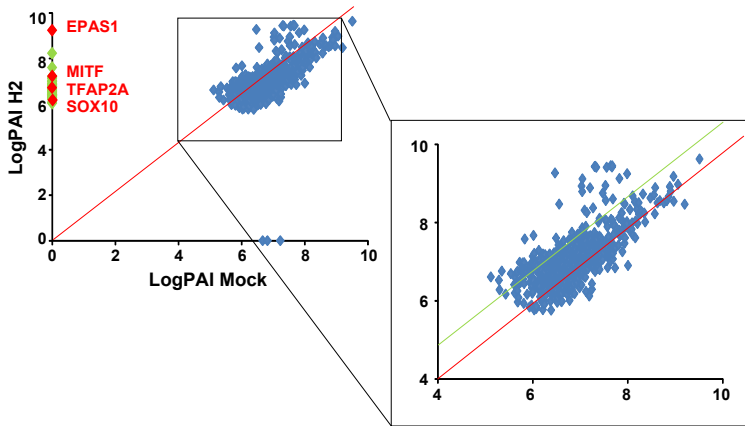

Experiment 4

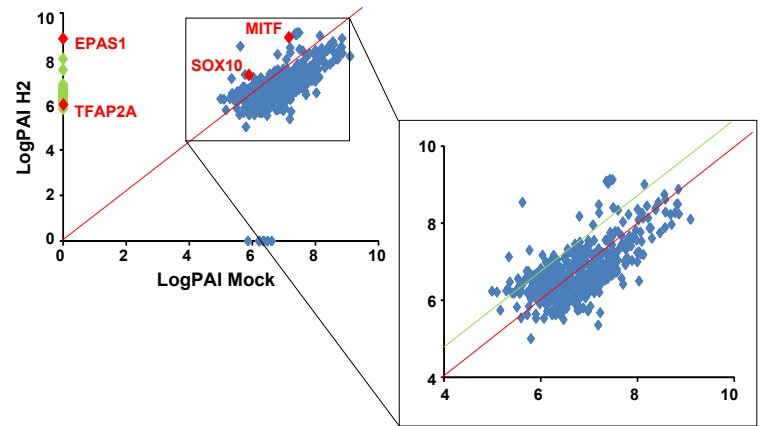

Supplemental figure 4

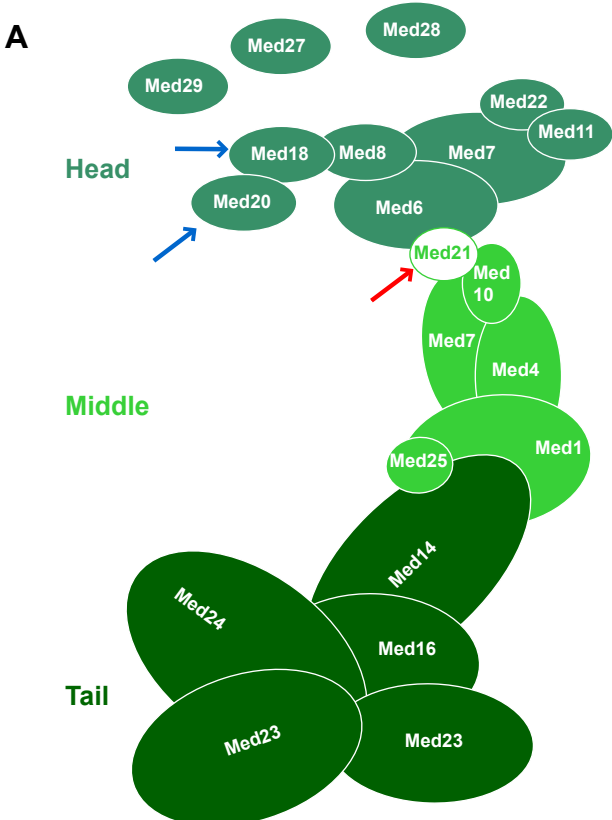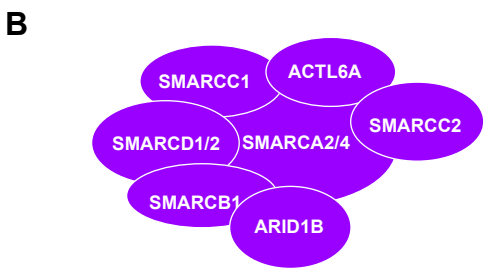



1205 EFSFQTLCCYGKQLCTIPRDAAYSYQNRHYHFCEKCFTEIQGENVTGLDDPSQPQTISK 1264 CREBBP  
\*\*\*\*\*  
1169 EFSFQTLCCYGKQLCTIPR**DATYYSYQNR**HYHFCEKCFNEIQGESVSLGDDPSQPQTINK 1228 EP300  
1265 DQFEKKNNDTLDPEFPVDCCEKGRKMHQICVLHYDIIWPSGFVCDNCLKKTGRPRKENKF 1324 CREBBP  
\* \* \* \* \*  
1229 EQFSKRKNDTLDPELFEVCTEGRKMHQICVLHHEIIWPAGFVCDGCLKKSARTRKENKF 1288 EP300  
1325 SAKRLQ**TRLGNHLEDR**VNKFLRRQNHPEAGEVFRVAVASSDK**TVEVKPGMK**SRFVDSGE 1384 CREBBP  
\*\*\*\*\*  
1289 SAK**RLPSTR**LGTFLERNVDFLR**RQNHPESEGEVTVR**VVHASDK**TVEVKPGMK**ARFVDSGE 1348 EP300  
1385 MSESFPYRTKALFAFEEIDGVDCFFGMHVQEYSGDCPPNTRRVYISYLDSEIHFRRPC 1444 CREBBP  
\* \* \* \* \*  
1349 MAESFPYRTKALFAFEEIDGVDCFFGMHVQEYSGDCPPNQRVYISYLDSEVHFRPKC 1408 EP300  
1445 LRTAVYHEILIGYLEYVKKLGYVTGHIWACPPSEGDDYIFHCHPPDQKIPKPKRLQEWYK 1504 CREBBP  
\*\*\*\*\*  
1409 LRTAVYHEILIGYLEYVKKLGYVTGHIWACPPSEGDDYIFHCHPPDQKIPKPKRLQEWYK 1468 EP300  
1505 KMLDKAFAER**IHDYKDIKQ**ATEDRLTSAKELPYFEGDFWPNVLEESIK**ELEQEEERK** 1564 CREBBP  
\*\*\*\*\*  
1469 KMLDKAVSER**IVHDYKDIKQ**ATEDRLTSAKELPYFEGDFWPNVLEESIK**ELEQEEERK** 1528 EP300  
1565 KEESTAASETTEGSQDGSNAKKNKTKNKNKSSISRANKKPSMPNVSNDLSQKLYAT 1624 CREBBP  
\* \* \* \* \*  
1529 **REENT SNESTDVTK**GDGSNAKKNKTKNKNKSSLSRGNKKPGMPNVSNDLSQKLYAT 1587 EP300  
1625 MEKHKEVFFVIHLHAGPVINTLPPIVDPDPLSCDLMGRDAFLTLARDKHWFSSLRSS 1684 CREBBP  
\*\*\*\*\*  
1588 MEKHKEVFFVIRLIAGPAANSLPPIVDPDPLPCDLMGRDAFLTLARDKHLEFSSLRRA 1647  
1685 KWSTLCMLVELHTQGQDRFVYTCNECKHHVETRWHCTVCEDYDLCINCYNTKSHAHKMVK 1744 CREBBP  
\* \* \* \* \*  
1648 QWSTMCMLVELHTQSQDRFVYTCNECKHHVETRWHCTVCEDYDLCITCYNTK**NHDHMEK** 1707 EP300  
1745 WGLGLDDESSQGEPPQSKSPQESRRLSIQRCIQSLVHACQCR**NANCSLPCQK**MKRVVQH 1804 CREBBP  
\*\*\*\*\*  
1708 LGLGLDDESNNQAAATQSPGDSRRLSIQRCIQSLVHACQCR**NANCSLPCQK**MKRVVQH 1767 EP300  
1805 TKGCKRKTNGGCPVCKQLIALCCYHAKHCQENKCPVPFCLNIKHLRQQQIQHR**LQQAQL** 1864 CREBBP  
\*\*\*\*\*  
1768 TKGCKRKTNGGCPICKQLIALCCYHAKHCQENKCPVPFCLNIKQLRQQQLQHR**LQQAQM** 1827 EP300  
1865 **MR**RRMATMNRNVP QQSLPSPTSAPPGTPT QQPSTPQTPPPAQPQSPVSMSPAGF 1921 CREBBP  
\*\*\*\*\*  
1828 **LR**RRMASMQRTGVVQQQLPSPTPATPTPTPTGQQPTTPQTPPTSQPQTPPNSMP 1884 EP300  
1922 PSVARTQPPTTVSTGKPTSQV PAPPPPAQPAAVEAARQIER**EAQQQOHL**YR 1974 CREBBP  
\* \* \* \* \*  
1885 PYLPR**TQAAGPVSQK**AAAGVTPPTPPQTAQPPLPGPPAAVEMAMQIQRAAETQRQMAH 1944 EP300  
1975 VNINNSMPPGRTGMGTGPGSQMAPVSLNVPRPNQV SGPVMPSPMPGQW QQ APL 2026 CREBBP  
\* \* \* \* \*  
1945 VQIFQR PIQHQMPPM TPMAPGMNPPMTRGSPGHLEP GMGPTGMQQPPWSQGG 2000 EP300  
2027 PQ QQPMPGLPRPVISMQAQ AAVAGPRMPSVQP PRSISPSALQDLLRRTLKS 2077 CREBBP  
\* \* \* \* \*  
2001 PQPQQQLQSGMPRPAMMSVAHQGPLNMAPQPGLGQVGISPLKPGTVSQQALQNLRLRLS 2060 EP300  
2078 PSSPQQQQVNLNLIK**SNPQLMAAFIK**QRTAKYVANQPGMQP QPGL QSQPGMQP 2130 CREBBP  
\*\*\*\*\*  
2061 PSSPLQQQQVLSILHANPQLLAAFIKQRAAKYANSNPQIPGQPGMPQGPGLQPPTMPG 2120 EP300  
2131 QPGMHQQPSLQNLNAMQAGVPRPGVPPQQQA MGGLNPQQQALNIMNPGHNPNM 2182 CREBBP  
\* \* \* \* \*  
2114 QQGVHNSPAMQNMNPMQAGVQRAGL PQQQPQQQLQPPMGMSQAQQQNMN NH 2172 EP300  
2183 ASMNPOYREMLRRQLLQQQQQQQQQQQQQSSAGMAGGMAGHGQFQQPQPGGYPP 2242 CREBBP  
\* \* \* \* \*  
2173 NTMPSQFRDILRRQ QMMQQQQQGGAGPGIGPGMANHNQFQQPGV GYPP 2221 EP300  
2243 AMQQQQRMQHLLPL QGSSMGQMAAQMGQLGQMGQPGLGADSTPNIQQALQQRILQQQM 2301 CREBBP  
\*\*\*\*\*  
2222 QQQQRMQHMQMQQGNMG QIGQLPQA LGAEAGASL QAYQQRLLQQQ M 2269 EP300  
2302 KQQIGSPGQPNPMSPPQHMLSGQPQASHLPQQIATSLSNQVRSAPVQSPRPQSQPPHS 2361 CREBBP  
\* \* \* \* \*  
2271 GSPVQPNPMSPPQHMLPNQAQSPHLQGGQIPNSLSNQVRSQPVPSPRPQSQPPHS 2325 EP300  
2362 SPSPRIQPQSPHHVSPQTGSPHPGLAVTMASIDQGHGHNPEQSAMPLQL NTPSR**SAL** 2420 CREBBP  
\*\*\*\*\*  
2326 SPSPRMQPQSPHHVSPQTSSPHPLVAQAQANPMEQGHFASPDQNSMLSQLASNPGMANL 2385 EP300  
2421 **SSELSLVGDTTGD**TLEKFEVGL 2442 CREBBP  
\* \* \* \* \*  
2386 HGASATDLGLSTDNSDLNSNLSQSTLDIH 2414 EP300

## Supplemental figure 6

**A**

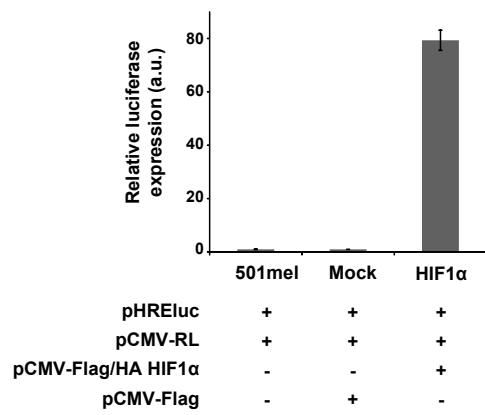

**B**

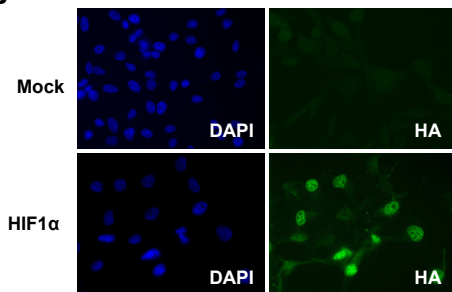

**C**

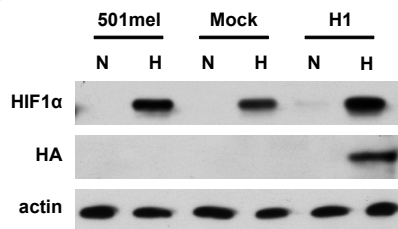

Supplemental figure 7

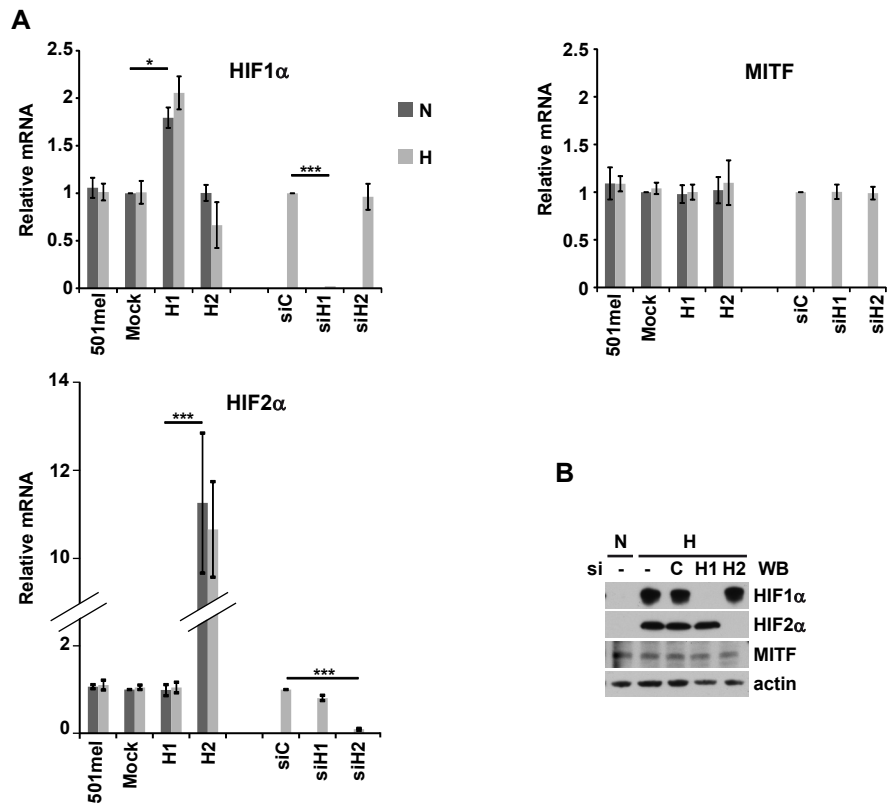



### Supplemental figure 8

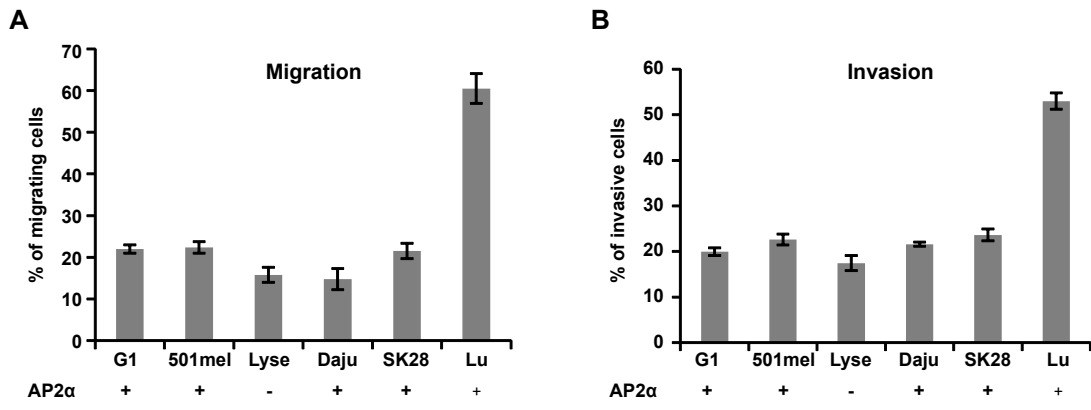

# Peptide View

MS/MS Fragmentation of **AYLDQTVVPILLOGLAVLAK**

Found in **IPI00028109**, Tax\_Id=9606 Gene\_Symbol=DPY30 Protein dpy-30 homolog

**Experiment:** FDR1% HIF2 2eme 091227\_A3 **Fraction:**

Match to Query 3219: 2124.259448 from(1063.137000,2+)

Title: OTMMD091227\_24.6750.6750.2.dta

Data file \\tol-brandir\Masse\Data LTQ-Orbitrap\Manuelle Ducoux\Manip Masse2 Hif 2 091227\OTMMD091227\_24.RAW

**Monoisotopic mass of neutral peptide Mr(calc):** 2124.255814 **Fixed modifications:** Carbamidomethyl (C) (apply to specified residues or termini only) **Ions Score:** 46

**Expect:** 8.1e-005 **Matches :** 25/186 fragment ions using 51 most intense peaks ([help](#))

| #  | b                  | b <sup>++</sup> | b <sup>*</sup>     | b <sup>+++</sup> | b <sup>0</sup>     | b <sup>0++</sup>  | Seq. | y                  | y <sup>++</sup> | y <sup>*</sup> | y <sup>+++</sup>  | y <sup>0</sup> | y <sup>0++</sup> | #  |
|----|--------------------|-----------------|--------------------|------------------|--------------------|-------------------|------|--------------------|-----------------|----------------|-------------------|----------------|------------------|----|
| 1  | 72.044390          | 36.525833       |                    |                  |                    |                   | A    |                    |                 |                |                   |                |                  | 20 |
| 2  | 235.107719         | 118.057498      |                    |                  |                    |                   | Y    | 2054.225993        | 1027.616634     | 2037.199444    | 1019.103360       | 2036.215428    | 1018.611352      | 19 |
| 3  | 348.191783         | 174.599529      |                    |                  |                    |                   | L    | <b>1891.162664</b> | 946.084970      | 1874.136115    | 937.571696        | 1873.152099    | 937.079687       | 18 |
| 4  | <b>463.218726</b>  | 232.113001      |                    |                  | 445.208161         | 223.107719        | D    | 1778.078600        | 889.542938      | 1761.052051    | 881.029664        | 1760.068035    | 880.537656       | 17 |
| 5  | 591.277304         | 296.142290      | 574.250755         | 287.629016       | 573.266739         | 287.137008        | Q    | <b>1663.051657</b> | 832.029467      | 1646.025108    | 823.516192        | 1645.041092    | 823.024184       | 16 |
| 6  | 692.324983         | 346.666130      | 675.298434         | 338.152855       | <b>674.314418</b>  | 337.660847        | T    | <b>1534.993079</b> | 768.000178      | 1517.966530    | 759.486903        | 1516.982514    | 758.994895       | 15 |
| 7  | <b>791.393397</b>  | 396.200337      | <b>774.366848</b>  | 387.687062       | <b>773.382832</b>  | 387.195054        | V    | <b>1433.945400</b> | 717.476338      | 1416.918851    | 708.963063        |                |                  | 14 |
| 8  | <b>890.461811</b>  | 445.734544      | <b>873.435262</b>  | 437.221269       | <b>872.451246</b>  | 436.729261        | V    | <b>1334.876986</b> | 667.942131      | 1317.850437    | 659.428857        |                |                  | 13 |
| 9  | 987.514575         | 494.260926      | 970.488026         | 485.747651       | 969.504010         | <b>485.255643</b> | P    | <b>1235.808572</b> | 618.407924      | 1218.782023    | 609.894650        |                |                  | 12 |
| 10 | 1100.598639        | 550.802958      | 1083.572090        | 542.289683       | 1082.588074        | 541.797675        | I    | 1138.755808        | 569.881542      | 1121.729259    | <b>561.368268</b> |                |                  | 11 |
| 11 | 1213.682703        | 607.344990      | 1196.656154        | 598.831715       | 1195.672138        | 598.339707        | L    | 1025.671744        | 513.339510      | 1008.645195    | 504.826236        |                |                  | 10 |
| 12 | 1326.766767        | 663.887021      | 1309.740218        | 655.373747       | 1308.756202        | 654.881739        | L    | <b>912.587680</b>  | 456.797478      | 895.561131     | 448.284204        |                |                  | 9  |
| 13 | 1454.825345        | 727.916311      | 1437.798796        | 719.403036       | 1436.814780        | 718.911028        | Q    | 799.503616         | 400.255446      | 782.477067     | 391.742172        |                |                  | 8  |
| 14 | 1511.846809        | 756.427042      | 1494.820260        | 747.913768       | <b>1493.836244</b> | 747.421760        | G    | <b>671.445038</b>  | 336.226157      | 654.418489     | 327.712883        |                |                  | 7  |
| 15 | <b>1624.930873</b> | 812.969074      | 1607.904324        | 804.455800       | 1606.920308        | 803.963792        | L    | 614.423574         | 307.715425      | 597.397025     | 299.202151        |                |                  | 6  |
| 16 | 1695.967987        | 848.487631      | 1678.941438        | 839.974357       | 1677.957422        | 839.482349        | A    | 501.339510         | 251.173393      | 484.312961     | 242.660119        |                |                  | 5  |
| 17 | <b>1795.036401</b> | 898.021838      | 1778.009852        | 889.508564       | 1777.025836        | 889.016556        | V    | <b>430.302396</b>  | 215.654836      | 413.275847     | 207.141562        |                |                  | 4  |
| 18 | <b>1908.120465</b> | 954.563870      | <b>1891.093916</b> | 946.050596       | 1890.109900        | 945.558588        | L    | <b>331.233982</b>  | 166.120629      | 314.207433     | 157.607355        |                |                  | 3  |
| 19 | 1979.157579        | 990.082427      | 1962.131030        | 981.569153       | 1961.147014        | 981.077145        | A    | 218.149918         | 109.578597      | 201.123369     | 101.065323        |                |                  | 2  |
| 20 |                    |                 |                    |                  |                    |                   | K    | 147.112804         | 74.060040       | 130.086255     | 65.546766         |                |                  | 1  |

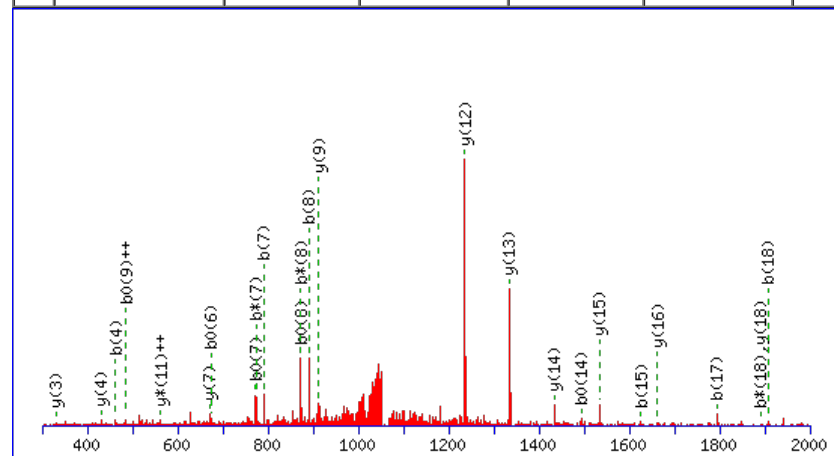

## Peptide View

MS/MS Fragmentation of **LNFIVTGLQIDK**

Found in **IPI00030481**, Tax\_Id=9606 Gene\_Symbol=MED10 Mediator of RNA polymerase II transcription subunit 10

**Experiment:** FDR1% HIF2 3ème 100401\_A3 **Fraction:**

Match to Query 3428: 1474.804448 from(738.409500,2+)

Title: OTMMD100401\_26.5554.5554.2.dta

Data file \\tol-brandir\Masse\Data LTQ-Orbitrap\Manuelle Ducoux\Manip Masse3 Hif2 100401\OTMMD100401\_26.RAW

**Monoisotopic mass of neutral peptide Mr(calc):** 1474.803146 **Fixed modifications:** Carbamidomethyl (C) (apply to specified residues or termini only) **Ions Score:** 78

**Expect:** 8.3e-007 **Matches :** 12/130 fragment ions using 13 most intense peaks ([help](#))

| #  | b                  | b <sup>++</sup> | b <sup>*</sup> | b <sup>*++</sup> | b <sup>0</sup> | b <sup>0++</sup> | Seq. | y                  | y <sup>++</sup> | y <sup>*</sup> | y <sup>*++</sup> | y <sup>0</sup> | y <sup>0++</sup> | #  |
|----|--------------------|-----------------|----------------|------------------|----------------|------------------|------|--------------------|-----------------|----------------|------------------|----------------|------------------|----|
| 1  | 114.091340         | 57.549308       |                |                  |                |                  | L    |                    |                 |                |                  |                |                  | 13 |
| 2  | 228.134267         | 114.570771      | 211.107718     | 106.057497       |                |                  | N    | 1362.726358        | 681.866817      | 1345.699809    | 673.353543       | 1344.715793    | 672.861535       | 12 |
| 3  | <b>375.202681</b>  | 188.104978      | 358.176132     | 179.591704       |                |                  | F    | <b>1248.683431</b> | 624.845354      | 1231.656882    | 616.332079       | 1230.672866    | 615.840071       | 11 |
| 4  | 488.286745         | 244.647010      | 471.260196     | 236.133736       |                |                  | I    | <b>1101.615017</b> | 551.311147      | 1084.588468    | 542.797872       | 1083.604452    | 542.305864       | 10 |
| 5  | <b>587.355159</b>  | 294.181218      | 570.328610     | 285.667943       |                |                  | V    | <b>988.530953</b>  | 494.769115      | 971.504404     | 486.255840       | 970.520388     | 485.763832       | 9  |
| 6  | 688.402838         | 344.705057      | 671.376289     | 336.191783       | 670.392273     | 335.699775       | T    | <b>889.462539</b>  | 445.234908      | 872.435990     | 436.721633       | 871.451974     | 436.229625       | 8  |
| 7  | 745.424302         | 373.215789      | 728.397753     | 364.702515       | 727.413737     | 364.210507       | G    | <b>788.414860</b>  | 394.711068      | 771.388311     | 386.197794       | 770.404295     | 385.705786       | 7  |
| 8  | 858.508366         | 429.757821      | 841.481817     | 421.244547       | 840.497801     | 420.752539       | L    | 731.393396         | 366.200336      | 714.366847     | 357.687062       | 713.382831     | 357.195054       | 6  |
| 9  | 986.566944         | 493.787110      | 969.540395     | 485.273836       | 968.556379     | 484.781828       | Q    | <b>618.309332</b>  | 309.658304      | 601.282783     | 301.145030       | 600.298767     | 300.653022       | 5  |
| 10 | <b>1101.593887</b> | 551.300582      | 1084.567338    | 542.787307       | 1083.583322    | 542.295299       | D    | <b>490.250754</b>  | 245.629015      | 473.224205     | 237.115741       | 472.240189     | 236.623733       | 4  |
| 11 | 1214.677951        | 607.842614      | 1197.651402    | 599.329339       | 1196.667386    | 598.837331       | I    | <b>375.223811</b>  | 188.115543      | 358.197262     | 179.602269       | 357.213246     | 179.110261       | 3  |
| 12 | 1329.704894        | 665.356085      | 1312.678345    | 656.842811       | 1311.694329    | 656.350803       | D    | <b>262.139747</b>  | 131.573512      | 245.113198     | 123.060237       | 244.129182     | 122.568229       | 2  |
| 13 |                    |                 |                |                  |                |                  | K    | 147.112804         | 74.060040       | 130.086255     | 65.546765        |                |                  | 1  |

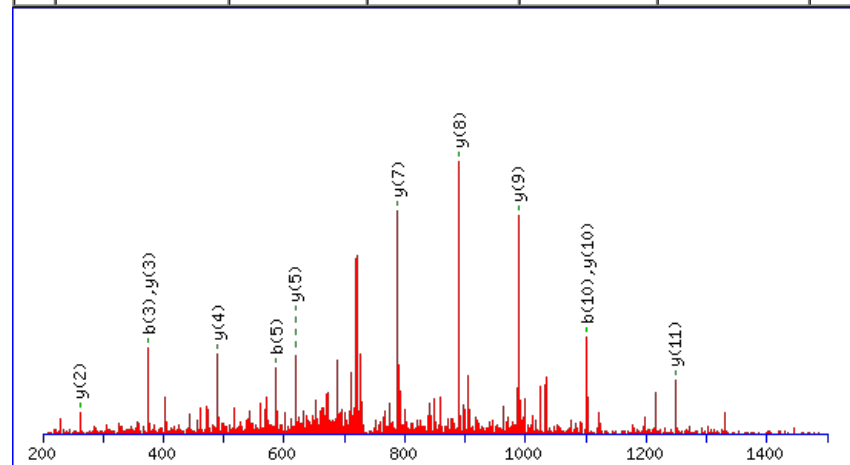

## Peptide View

MS/MS Fragmentation of **EIGAILQNAGTVILELSK**

Found in **IP100000305**, Tax\_Id=9606 Gene\_Symbol=MED11 Mediator of RNA polymerase II transcription subunit 11

**Experiment:** FDR1% HIF2 3ème 100401\_A3 **Fraction:**

Match to Query 4201: 1868.066048 from(935.040300,2+)

Title: OTMMD100401\_26.6977.6977.2.dta

Data file \\tol-brandir\Masse\Data LTQ-Orbitrap\Manuelle Ducoux\Manip Masse3 Hif2 100401\OTMMD100401\_26.RAW

**Monoisotopic mass of neutral peptide Mr(calc):** 1868.061844 **Fixed modifications:** Carbamidomethyl (C) (apply to specified residues or termini only) **Ions Score:** 89

**Expect:** 2.2e-008 **Matches :** 13/190 fragment ions using 16 most intense peaks ([help](#))

| #  | b           | b <sup>++</sup> | b*          | b <sup>+++</sup> | b <sup>0</sup> | b <sup>0++</sup> | Seq. | y           | y <sup>++</sup> | y*          | y <sup>+++</sup> | y <sup>0</sup> | y <sup>0++</sup> | #  |
|----|-------------|-----------------|-------------|------------------|----------------|------------------|------|-------------|-----------------|-------------|------------------|----------------|------------------|----|
| 1  | 130.049869  | 65.528572       |             |                  | 112.039304     | 56.523290        | E    |             |                 |             |                  |                |                  | 18 |
| 2  | 243.133933  | 122.070605      |             |                  | 225.123368     | 113.065322       | I    | 1740.026563 | 870.516920      | 1723.000014 | 862.003645       | 1722.015998    | 861.511637       | 17 |
| 3  | 300.155397  | 150.581336      |             |                  | 282.144832     | 141.576054       | G    | 1626.942499 | 813.974888      | 1609.915950 | 805.461613       | 1608.931934    | 804.969605       | 16 |
| 4  | 371.192511  | 186.099894      |             |                  | 353.181946     | 177.094611       | A    | 1569.921035 | 785.464156      | 1552.894486 | 776.950881       | 1551.910470    | 776.458873       | 15 |
| 5  | 484.276575  | 242.641926      |             |                  | 466.266010     | 233.636643       | I    | 1498.883921 | 749.945598      | 1481.857372 | 741.432324       | 1480.873356    | 740.940316       | 14 |
| 6  | 597.360639  | 299.183958      |             |                  | 579.350074     | 290.178675       | L    | 1385.799857 | 693.403567      | 1368.773308 | 684.890292       | 1367.789292    | 684.398284       | 13 |
| 7  | 725.419217  | 363.213247      | 708.392668  | 354.699972       | 707.408652     | 354.207964       | Q    | 1272.715793 | 636.861535      | 1255.689244 | 628.348260       | 1254.705228    | 627.856252       | 12 |
| 8  | 839.462144  | 420.234710      | 822.435595  | 411.721436       | 821.451579     | 411.229428       | N    | 1144.657215 | 572.832246      | 1127.630666 | 564.318971       | 1126.646650    | 563.826963       | 11 |
| 9  | 910.499258  | 455.753267      | 893.472709  | 447.239993       | 892.488693     | 446.747985       | A    | 1030.614288 | 515.810782      | 1013.587739 | 507.297507       | 1012.603723    | 506.805500       | 10 |
| 10 | 967.520722  | 484.263999      | 950.494173  | 475.750725       | 949.510157     | 475.258717       | G    | 959.577174  | 480.292225      | 942.550625  | 471.778951       | 941.566609     | 471.286943       | 9  |
| 11 | 1068.568401 | 534.787839      | 1051.541852 | 526.274564       | 1050.557836    | 525.782556       | T    | 902.555710  | 451.781493      | 885.529161  | 443.268218       | 884.545145     | 442.776210       | 8  |
| 12 | 1167.636815 | 584.322046      | 1150.610266 | 575.808771       | 1149.626250    | 575.316763       | V    | 801.508031  | 401.257654      | 784.481482  | 392.744379       | 783.497466     | 392.252371       | 7  |
| 13 | 1280.720879 | 640.864078      | 1263.694330 | 632.350803       | 1262.710314    | 631.858795       | I    | 702.439617  | 351.723447      | 685.413068  | 343.210172       | 684.429052     | 342.718164       | 6  |
| 14 | 1393.804943 | 697.406109      | 1376.778394 | 688.892835       | 1375.794378    | 688.400827       | L    | 589.355553  | 295.181415      | 572.329004  | 286.668140       | 571.344988     | 286.176132       | 5  |
| 15 | 1522.847536 | 761.927406      | 1505.820987 | 753.414132       | 1504.836971    | 752.922124       | E    | 476.271489  | 238.639383      | 459.244940  | 230.126108       | 458.260924     | 229.634100       | 4  |
| 16 | 1635.931600 | 818.469438      | 1618.905051 | 809.956164       | 1617.921035    | 809.464155       | L    | 347.228896  | 174.118086      | 330.202347  | 165.604811       | 329.218331     | 165.112803       | 3  |
| 17 | 1722.963628 | 861.985452      | 1705.937079 | 853.472178       | 1704.953063    | 852.980169       | S    | 234.144832  | 117.576054      | 217.118283  | 109.062780       | 216.134267     | 108.570772       | 2  |
| 18 |             |                 |             |                  |                |                  | K    | 147.112804  | 74.060040       | 130.086255  | 65.546765        |                |                  | 1  |

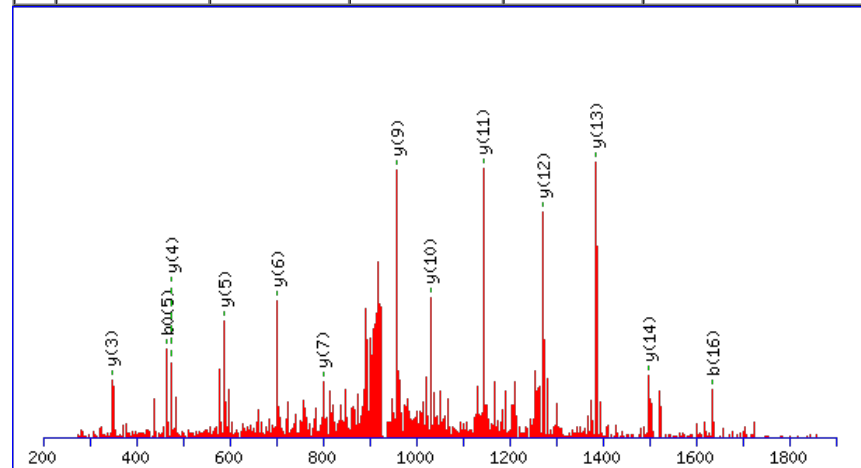

# Peptide View

MS/MS Fragmentation of **LHHQNQQQIQQQQQQLOR**  
 Found in **IPI00879996**, Tax\_Id=9606 Gene\_Symbol=MED15 Protein  
**Experiment:** FDR1% HIF2 3èmeBis 100419\_A3 **Fraction:**

Match to Query 3635: 2310.174072 from(771.065300,3+)

Title: OTMMD100419\_18.1409.1409.3.dta

Data file \\tol-brandir\Masse\Data LTQ-Orbitrap\Manuelle Ducoux\Manip masse3 injection2 HIF2 100419\OTMMD100419\_18.RAW

**Monoisotopic mass of neutral peptide Mr(calc):** 2310.168961 **Fixed modifications:** Carbamidomethyl (C) (apply to specified residues or termini only) **Ions Score:** 43 **Expect:** 0.0029 **Matches :** 38/130 fragment ions using 79 most intense peaks ([help](#))

| #  | b                  | b <sup>++</sup>    | b <sup>*</sup>     | b <sup>***</sup>  | Seq. | y                  | y <sup>++</sup>    | y <sup>*</sup>     | y <sup>***</sup>  | #  |
|----|--------------------|--------------------|--------------------|-------------------|------|--------------------|--------------------|--------------------|-------------------|----|
| 1  | 114.091340         | 57.549308          |                    |                   | L    |                    |                    |                    |                   | 18 |
| 2  | <b>251.150252</b>  | 126.078764         |                    |                   | H    | 2198.092189        | 1099.549732        | 2181.065640        | 1091.036458       | 17 |
| 3  | 388.209164         | 194.608220         |                    |                   | H    | 2061.033277        | <b>1031.020276</b> | 2044.006728        | 1022.507002       | 16 |
| 4  | 516.267742         | 258.637509         | <b>499.241193</b>  | 250.124235        | Q    | 1923.974365        | 962.490821         | 1906.947816        | 953.977546        | 15 |
| 5  | 630.310669         | <b>315.658973</b>  | 613.284120         | 307.145698        | N    | <b>1795.915787</b> | 898.461532         | 1778.889238        | 889.948257        | 14 |
| 6  | 758.369247         | 379.688262         | 741.342698         | 371.174987        | Q    | 1681.872860        | 841.440068         | 1664.846311        | 832.926794        | 13 |
| 7  | <b>886.427825</b>  | <b>443.717551</b>  | 869.401276         | 435.204276        | Q    | 1553.814282        | 777.410779         | 1536.787733        | 768.897505        | 12 |
| 8  | 1014.486403        | <b>507.746840</b>  | 997.459854         | <b>499.233565</b> | Q    | 1425.755704        | 713.381490         | 1408.729155        | 704.868216        | 11 |
| 9  | <b>1127.570467</b> | <b>564.288872</b>  | 1110.543918        | 555.775597        | I    | <b>1297.697126</b> | 649.352201         | 1280.670577        | 640.838927        | 10 |
| 10 | <b>1255.629045</b> | <b>628.318160</b>  | 1238.602496        | <b>619.804886</b> | Q    | <b>1184.613062</b> | 592.810169         | <b>1167.586513</b> | <b>584.296895</b> | 9  |
| 11 | <b>1383.687623</b> | <b>692.347450</b>  | 1366.661074        | 683.834175        | Q    | <b>1056.554484</b> | 528.780880         | 1039.527935        | <b>520.267606</b> | 8  |
| 12 | <b>1511.746201</b> | <b>756.376739</b>  | <b>1494.719652</b> | 747.863464        | Q    | <b>928.495906</b>  | 464.751591         | <b>911.469357</b>  | 456.238317        | 7  |
| 13 | <b>1639.804779</b> | 820.406028         | 1622.778230        | 811.892753        | Q    | 800.437328         | <b>400.722302</b>  | 783.410779         | 392.209028        | 6  |
| 14 | 1767.863357        | <b>884.435317</b>  | 1750.836808        | <b>875.922042</b> | Q    | <b>672.378750</b>  | 336.693013         | 655.352201         | 328.179739        | 5  |
| 15 | 1895.921935        | <b>948.464606</b>  | 1878.895386        | 939.951331        | Q    | <b>544.320172</b>  | 272.663724         | 527.293623         | 264.150449        | 4  |
| 16 | 2009.005999        | <b>1005.006638</b> | 1991.979450        | 996.493363        | L    | <b>416.261594</b>  | 208.634435         | 399.235045         | 200.121160        | 3  |
| 17 | 2137.064577        | <b>1069.035927</b> | 2120.038028        | 1060.522652       | Q    | <b>303.177530</b>  | 152.092403         | 286.150981         | 143.579128        | 2  |
| 18 |                    |                    |                    |                   | R    | 175.118952         | 88.063114          | 158.092403         | 79.549839         | 1  |

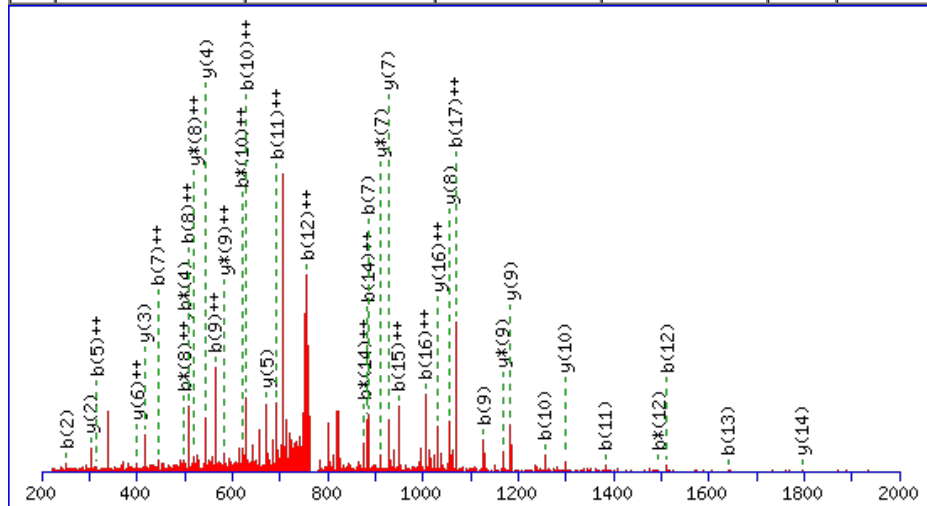

## Peptide View

MS/MS Fragmentation of **LAHECLSQSCDSA**K

Found in **IPI00032780**, Tax\_Id=9606 Gene\_Symbol=MED29 cDNA FLJ54860, highly similar to Homo sapiens intersex-lik (IXL), mRNA

**Experiment:** FDR1% HIF2 3ème 100401\_A3 **Fraction:**

Match to Query 4133: 1604.695448 from(803.355000,2+)

Title: OTMMD100401\_25.1290.1290.2.dta

Data file \\tol-brandir\Masse\Data LTQ-Orbitrap\Manuelle Ducoux\Manip Masse3 Hif2 100401\OTMMD100401\_25.RAW

**Monoisotopic mass of neutral peptide Mr(calc):** 1604.692276 **Fixed modifications:** Carbamidomethyl (C) (apply to specified residues or termini only) **Ions Score:** 54

**Expect:** 8.1e-005 **Matches :** 18/132 fragment ions using 27 most intense peaks ([help](#))

| #  | b                  | b <sup>++</sup> | b <sup>*</sup>     | b <sup>*++</sup> | b <sup>0</sup>     | b <sup>0++</sup> | Seq. | y                  | y <sup>++</sup>   | y <sup>*</sup> | y <sup>*++</sup> | y <sup>0</sup> | y <sup>0++</sup> | #  |
|----|--------------------|-----------------|--------------------|------------------|--------------------|------------------|------|--------------------|-------------------|----------------|------------------|----------------|------------------|----|
| 1  | 114.091340         | 57.549308       |                    |                  |                    |                  | L    |                    |                   |                |                  |                |                  | 14 |
| 2  | 185.128454         | 93.067865       |                    |                  |                    |                  | A    | 1492.615504        | 746.811390        | 1475.588955    | 738.298116       | 1474.604939    | 737.806108       | 13 |
| 3  | <b>322.187366</b>  | 161.597321      |                    |                  |                    |                  | H    | 1421.578390        | <b>711.292833</b> | 1404.551841    | 702.779559       | 1403.567825    | 702.287551       | 12 |
| 4  | <b>451.229959</b>  | 226.118617      |                    |                  | 433.219394         | 217.113335       | E    | <b>1284.519478</b> | 642.763377        | 1267.492929    | 634.250103       | 1266.508913    | 633.758095       | 11 |
| 5  | <b>611.260608</b>  | 306.133942      |                    |                  | 593.250043         | 297.128660       | C    | <b>1155.476885</b> | 578.242081        | 1138.450336    | 569.728806       | 1137.466320    | 569.236798       | 10 |
| 6  | <b>724.344672</b>  | 362.675974      |                    |                  | 706.334107         | 353.670692       | L    | <b>995.446236</b>  | 498.226756        | 978.419687     | 489.713482       | 977.435671     | 489.221474       | 9  |
| 7  | 811.376700         | 406.191988      |                    |                  | 793.366135         | 397.186706       | S    | <b>882.362172</b>  | 441.684724        | 865.335623     | 433.171450       | 864.351607     | 432.679442       | 8  |
| 8  | <b>939.435278</b>  | 470.221277      | 922.408729         | 461.708003       | 921.424713         | 461.215995       | Q    | 795.330144         | 398.168710        | 778.303595     | 389.655436       | 777.319579     | 389.163428       | 7  |
| 9  | 1026.467306        | 513.737291      | 1009.440757        | 505.224017       | 1008.456741        | 504.732009       | S    | 667.271566         | 334.139421        | 650.245017     | 325.626147       | 649.261001     | 325.134139       | 6  |
| 10 | 1186.497955        | 593.752616      | 1169.471406        | 585.239341       | 1168.487390        | 584.747333       | C    | <b>580.239538</b>  | 290.623407        | 563.212989     | 282.110133       | 562.228973     | 281.618125       | 5  |
| 11 | <b>1301.524898</b> | 651.266087      | <b>1284.498349</b> | 642.752813       | 1283.514333        | 642.260805       | D    | <b>420.208889</b>  | 210.608083        | 403.182340     | 202.094808       | 402.198324     | 201.602800       | 4  |
| 12 | <b>1388.556926</b> | 694.782101      | 1371.530377        | 686.268827       | 1370.546361        | 685.776819       | S    | <b>305.181946</b>  | 153.094611        | 288.155397     | 144.581337       | 287.171381     | 144.089329       | 3  |
| 13 | <b>1459.594040</b> | 730.300658      | 1442.567491        | 721.787384       | <b>1441.583475</b> | 721.295376       | A    | 218.149918         | 109.578597        | 201.123369     | 101.065322       |                |                  | 2  |
| 14 |                    |                 |                    |                  |                    |                  | K    | 147.112804         | 74.060040         | 130.086255     | 65.546765        |                |                  | 1  |

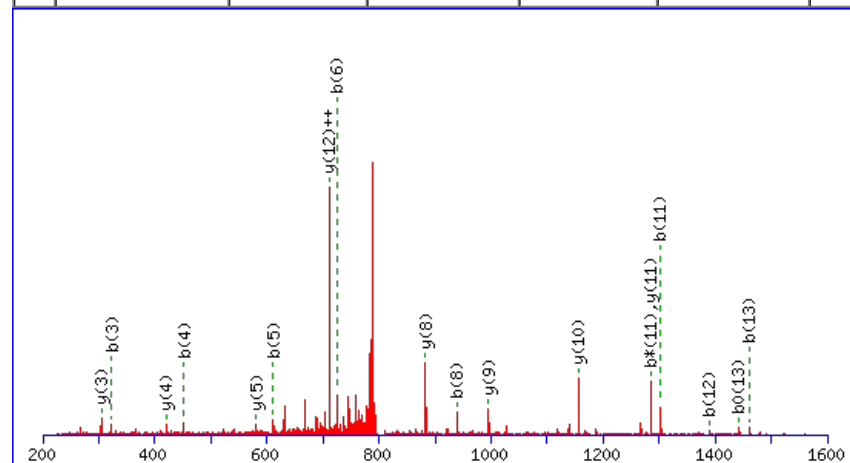

## Peptide View

MS/MS Fragmentation of **YQEQLVQEQELAK**

Found in **IPI00984935**, Tax\_Id=9606 Gene\_Symbol=NCAPD3 Uncharacterized protein

**Experiment:** FDR1% HIF2 2ème 091227\_A3bis **Fraction:**

Match to Query 2547: 1604.805448 from(803.410000,2+)

Title: OTMMD091227\_29.2432.2432.2.dta

Data file \\tol-brandir\Masse\Data LTQ-Orbitrap\Manuelle Ducoux\Manip Masse2 Hif 2 091227\OTMMD091227\_29.RAW

**Monoisotopic mass of neutral peptide Mr(calc):** 1604.804565 **Fixed modifications:** Carbamidomethyl (C) (apply to specified residues or termini only) **Ions Score:** 46

**Expect:** 0.0022 **Matches :** 16/132 fragment ions using 28 most intense peaks ([help](#))

| #  | b                  | b <sup>++</sup>   | b <sup>*</sup>    | b <sup>***</sup> | b <sup>0</sup> | b <sup>0++</sup> | Seq. | y                  | y <sup>++</sup> | y <sup>*</sup>    | y <sup>***</sup> | y <sup>0</sup> | y <sup>0++</sup> | #  |
|----|--------------------|-------------------|-------------------|------------------|----------------|------------------|------|--------------------|-----------------|-------------------|------------------|----------------|------------------|----|
| 1  | 164.070605         | 82.538940         |                   |                  |                |                  | Y    |                    |                 |                   |                  |                |                  | 13 |
| 2  | <b>292.129183</b>  | 146.568230        | <b>275.102634</b> | 138.054955       |                |                  | Q    | 1442.748551        | 721.877913      | 1425.722002       | 713.364639       | 1424.737986    | 712.872631       | 12 |
| 3  | <b>421.171776</b>  | 211.089526        | 404.145227        | 202.576252       | 403.161211     | 202.084244       | E    | <b>1314.689973</b> | 657.848625      | 1297.663424       | 649.335350       | 1296.679408    | 648.843342       | 11 |
| 4  | 549.230354         | <b>275.118815</b> | 532.203805        | 266.605541       | 531.219789     | 266.113533       | Q    | <b>1185.647380</b> | 593.327328      | 1168.620831       | 584.814054       | 1167.636815    | 584.322045       | 10 |
| 5  | 662.314418         | <b>331.660847</b> | 645.287869        | 323.147573       | 644.303853     | 322.655565       | L    | <b>1057.588802</b> | 529.298039      | 1040.562253       | 520.784765       | 1039.578237    | 520.292757       | 9  |
| 6  | 761.382832         | 381.195054        | 744.356283        | 372.681780       | 743.372267     | 372.189772       | V    | <b>944.504738</b>  | 472.756007      | 927.478189        | 464.242732       | 926.494173     | 463.750724       | 8  |
| 7  | 889.441410         | 445.224343        | 872.414861        | 436.711069       | 871.430845     | 436.219061       | Q    | <b>845.436324</b>  | 423.221800      | <b>828.409775</b> | 414.708526       | 827.425759     | 414.216518       | 7  |
| 8  | 1018.484003        | 509.745640        | 1001.457454       | 501.232365       | 1000.473438    | 500.740357       | E    | <b>717.377746</b>  | 359.192511      | 700.351197        | 350.679237       | 699.367181     | 350.187229       | 6  |
| 9  | 1146.542581        | 573.774928        | 1129.516032       | 565.261654       | 1128.532016    | 564.769646       | Q    | 588.335153         | 294.671215      | 571.308604        | 286.157940       | 570.324588     | 285.665932       | 5  |
| 10 | 1275.585174        | 638.296225        | 1258.558625       | 629.782951       | 1257.574609    | 629.290943       | E    | <b>460.276575</b>  | 230.641925      | 443.250026        | 222.128651       | 442.266010     | 221.636643       | 4  |
| 11 | <b>1388.669238</b> | 694.838257        | 1371.642689       | 686.324983       | 1370.658673    | 685.832974       | L    | <b>331.233982</b>  | 166.120629      | 314.207433        | 157.607354       |                |                  | 3  |
| 12 | <b>1459.706352</b> | 730.356814        | 1442.679803       | 721.843540       | 1441.695787    | 721.351531       | A    | 218.149918         | 109.578597      | 201.123369        | 101.065322       |                |                  | 2  |
| 13 |                    |                   |                   |                  |                |                  | K    | 147.112804         | 74.060040       | 130.086255        | 65.546765        |                |                  | 1  |

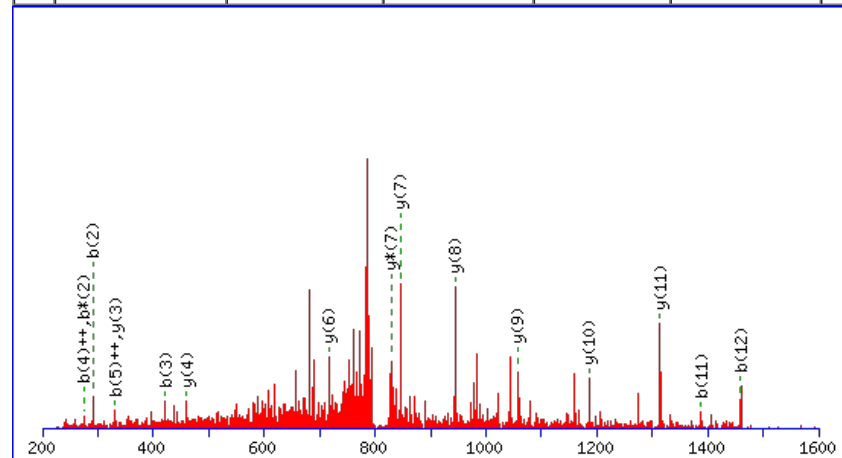

## Peptide View

MS/MS Fragmentation of **NSPNNISGISNPPGTPR**

Found in **IPI00157304**, Tax\_Id=9606 Gene\_Symbol=SSBP3 Isoform 1 of Single-stranded DNA-binding protein 3

**Experiment:** FDR1% HIF2 2ème 091227\_A3bis **Fraction:**

Match to Query 2755: 1720.849448 from(861.432000,2+)

Title: OTMMD091227\_35.1838.1838.2.dta

Data file \\tol-brandir\Masse\Data LTQ-Orbitrap\Manuelle Ducoux\Manip Masse2 Hif 2 091227\OTMMD091227\_35.RAW

**Monoisotopic mass of neutral peptide Mr(calc):** 1720.849243 **Fixed modifications:** Carbamidomethyl (C) (apply to specified residues or termini only) **Ions Score:** 66

**Expect:** 1.8e-005 **Matches :** 14/186 fragment ions using 15 most intense peaks ([help](#))

| #  | b                  | b <sup>++</sup> | b <sup>*</sup>    | b <sup>*++</sup> | b <sup>0</sup>     | b <sup>0++</sup> | Seq. | y                  | y <sup>++</sup> | y <sup>*</sup> | y <sup>*++</sup> | y <sup>0</sup> | y <sup>0++</sup> | #  |
|----|--------------------|-----------------|-------------------|------------------|--------------------|------------------|------|--------------------|-----------------|----------------|------------------|----------------|------------------|----|
| 1  | 115.050203         | 58.028740       | 98.023654         | 49.515465        |                    |                  | N    |                    |                 |                |                  |                |                  | 17 |
| 2  | 202.082231         | 101.544753      | 185.055682        | 93.031479        | 184.071666         | 92.539471        | S    | 1607.813608        | 804.410442      | 1590.787059    | 795.897168       | 1589.803043    | 795.405160       | 16 |
| 3  | 299.134995         | 150.071135      | 282.108446        | 141.557861       | 281.124430         | 141.065853       | P    | 1520.781580        | 760.894428      | 1503.755031    | 752.381154       | 1502.771015    | 751.889146       | 15 |
| 4  | 413.177922         | 207.092599      | 396.151373        | 198.579324       | 395.167357         | 198.087316       | N    | 1423.728816        | 712.368046      | 1406.702267    | 703.854772       | 1405.718251    | 703.362764       | 14 |
| 5  | <b>527.220849</b>  | 264.114063      | 510.194300        | 255.600788       | 509.210284         | 255.108780       | N    | <b>1309.685889</b> | 655.346583      | 1292.659340    | 646.833308       | 1291.675324    | 646.341300       | 13 |
| 6  | 640.304913         | 320.656095      | 623.278364        | 312.142820       | 622.294348         | 311.650812       | I    | <b>1195.642962</b> | 598.325119      | 1178.616413    | 589.811845       | 1177.632397    | 589.319837       | 12 |
| 7  | 727.336941         | 364.172109      | 710.310392        | 355.658834       | 709.326376         | 355.166826       | S    | <b>1082.558898</b> | 541.783087      | 1065.532349    | 533.269813       | 1064.548333    | 532.777805       | 11 |
| 8  | 784.358405         | 392.682841      | 767.331856        | 384.169566       | 766.347840         | 383.677558       | G    | <b>995.526870</b>  | 498.267073      | 978.500321     | 489.753799       | 977.516305     | 489.261791       | 10 |
| 9  | 897.442469         | 449.224873      | <b>880.415920</b> | 440.711598       | 879.431904         | 440.219590       | I    | 938.505406         | 469.756341      | 921.478857     | 461.243067       | 920.494841     | 460.751059       | 9  |
| 10 | 984.474497         | 492.740887      | 967.447948        | 484.227612       | 966.463932         | 483.735604       | S    | 825.421342         | 413.214309      | 808.394793     | 404.701035       | 807.410777     | 404.209027       | 8  |
| 11 | 1098.517424        | 549.762350      | 1081.490875       | 541.249076       | 1080.506859        | 540.757068       | N    | <b>738.389314</b>  | 369.698295      | 721.362765     | 361.185021       | 720.378749     | 360.693013       | 7  |
| 12 | <b>1195.570188</b> | 598.288732      | 1178.543639       | 589.775458       | 1177.559623        | 589.283450       | P    | <b>624.346387</b>  | 312.676832      | 607.319838     | 304.163557       | 606.335822     | 303.671549       | 6  |
| 13 | 1292.622952        | 646.815114      | 1275.596403       | 638.301840       | 1274.612387        | 637.809832       | P    | <b>527.293623</b>  | 264.150450      | 510.267074     | 255.637175       | 509.283058     | 255.145167       | 5  |
| 14 | 1349.644416        | 675.325846      | 1332.617867       | 666.812572       | 1331.633851        | 666.320564       | G    | 430.240859         | 215.624067      | 413.214310     | 207.110793       | 412.230294     | 206.618785       | 4  |
| 15 | <b>1450.692095</b> | 725.849686      | 1433.665546       | 717.336411       | <b>1432.681530</b> | 716.844403       | T    | 373.219395         | 187.113335      | 356.192846     | 178.600061       | 355.208830     | 178.108053       | 3  |
| 16 | <b>1547.744859</b> | 774.376068      | 1530.718310       | 765.862793       | 1529.734294        | 765.370785       | P    | <b>272.171716</b>  | 136.589496      | 255.145167     | 128.076221       |                |                  | 2  |
| 17 |                    |                 |                   |                  |                    |                  | R    | 175.118952         | 88.063114       | 158.092403     | 79.549839        |                |                  | 1  |

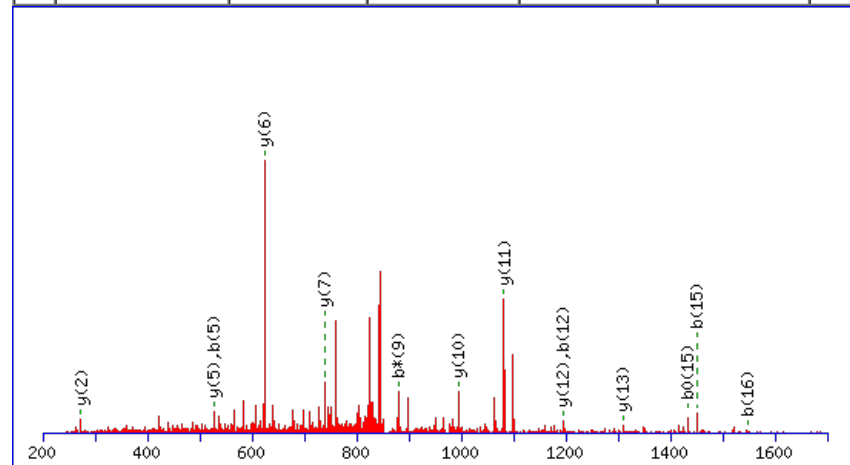



## Peptide View

MS/MS Fragmentation of **RPAAAAAAGSASPR**

Found in **IPI00102997**, Tax\_Id=9606 Gene\_Symbol=WRNIP1 Isoform 2 of ATPase WRNIP1

**Experiment:** FDR1% HIF2 2ème 091227\_A3 **Fraction:**

Match to Query 1755: 1252.662648 from(627.338600,2+)

Title: OTMMD091227\_18.640.640.2.dta

Data file \\tol-brandir\Masse\Data LTQ-Orbitrap\Manuelle Ducoux\Manip Masse2 Hif 2 091227\OTMMD091227\_18.RAW

**Monoisotopic mass of neutral peptide Mr(calc):** 1252.663589 **Fixed modifications:** Carbamidomethyl (C) (apply to specified residues or termini only) **Ions Score:** 42

**Expect:** 0.0037 **Matches :** 26/134 fragment ions using 55 most intense peaks ([help](#))

| #  | b           | b <sup>++</sup> | b <sup>*</sup> | b <sup>***</sup> | b <sup>0</sup> | b <sup>0++</sup> | Seq. | y           | y <sup>++</sup> | y <sup>*</sup> | y <sup>***</sup> | y <sup>0</sup> | y <sup>0++</sup> | #  |
|----|-------------|-----------------|----------------|------------------|----------------|------------------|------|-------------|-----------------|----------------|------------------|----------------|------------------|----|
| 1  | 157.108387  | 79.057831       | 140.081838     | 70.544557        |                |                  | R    |             |                 |                |                  |                |                  | 14 |
| 2  | 254.161151  | 127.584213      | 237.134602     | 119.070939       |                |                  | P    | 1097.569798 | 549.288537      | 1080.543249    | 540.775263       | 1079.559233    | 540.283255       | 13 |
| 3  | 325.198265  | 163.102770      | 308.171716     | 154.589496       |                |                  | A    | 1000.517034 | 500.762155      | 983.490485     | 492.248880       | 982.506469     | 491.756872       | 12 |
| 4  | 396.235379  | 198.621328      | 379.208830     | 190.108053       |                |                  | A    | 929.479920  | 465.243598      | 912.453371     | 456.730324       | 911.469355     | 456.238316       | 11 |
| 5  | 467.272493  | 234.139884      | 450.245944     | 225.626610       |                |                  | A    | 858.442806  | 429.725041      | 841.416257     | 421.211766       | 840.432241     | 420.719758       | 10 |
| 6  | 538.309607  | 269.658442      | 521.283058     | 261.145167       |                |                  | A    | 787.405692  | 394.206484      | 770.379143     | 385.693209       | 769.395127     | 385.201201       | 9  |
| 7  | 609.346721  | 305.176999      | 592.320172     | 296.663724       |                |                  | A    | 716.368578  | 358.687927      | 699.342029     | 350.174652       | 698.358013     | 349.682644       | 8  |
| 8  | 680.383835  | 340.695556      | 663.357286     | 332.182281       |                |                  | A    | 645.331464  | 323.169370      | 628.304915     | 314.656095       | 627.320899     | 314.164087       | 7  |
| 9  | 737.405299  | 369.206288      | 720.378750     | 360.693013       |                |                  | G    | 574.294350  | 287.650813      | 557.267801     | 279.137539       | 556.283785     | 278.645531       | 6  |
| 10 | 824.437327  | 412.722302      | 807.410778     | 404.209027       | 806.426762     | 403.717019       | S    | 517.272886  | 259.140081      | 500.246337     | 250.626806       | 499.262321     | 250.134798       | 5  |
| 11 | 895.474441  | 448.240859      | 878.447892     | 439.727584       | 877.463876     | 439.235576       | A    | 430.240858  | 215.624067      | 413.214309     | 207.110792       | 412.230293     | 206.618784       | 4  |
| 12 | 982.506469  | 491.756872      | 965.479920     | 483.243598       | 964.495904     | 482.751590       | S    | 359.203744  | 180.105510      | 342.177195     | 171.592235       | 341.193179     | 171.100227       | 3  |
| 13 | 1079.559233 | 540.283255      | 1062.532684    | 531.769980       | 1061.548668    | 531.277972       | P    | 272.171716  | 136.589496      | 255.145167     | 128.076221       |                |                  | 2  |
| 14 |             |                 |                |                  |                |                  | R    | 175.118952  | 88.063114       | 158.092403     | 79.549839        |                |                  | 1  |

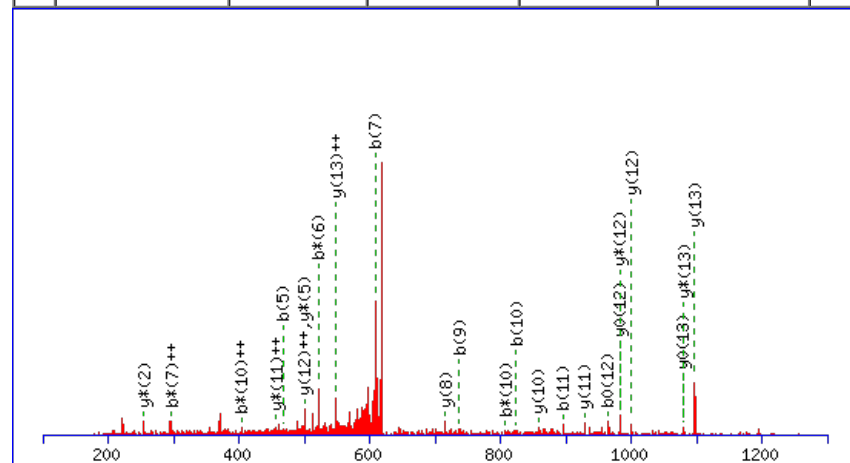

Supplement: supp_M112.020727_mcp.M112.020727-1.pdf [file supp_M112.020727_mcp.M112.020727-1.pdf]
